# Supplementary material for: Atorvastatin-induced senescence of hepatocellular carcinoma is mediated by downregulation of hTERT through the suppression of the IL-6/STAT3 pathway
Source: PubMed Central journal article supplement (PMC7105491; doi:10.1038/s41420-020-0252-9), 2020-03-30
Supplement: 41420_2020_252_MOESM3_ESM.pdf [file 41420_2020_252_MOESM3_ESM.pdf]

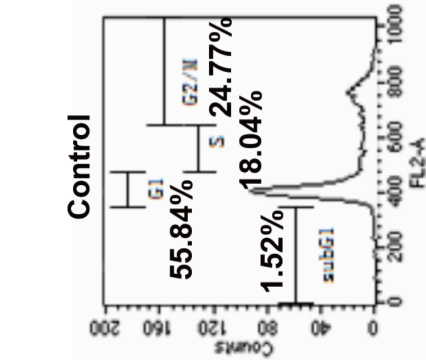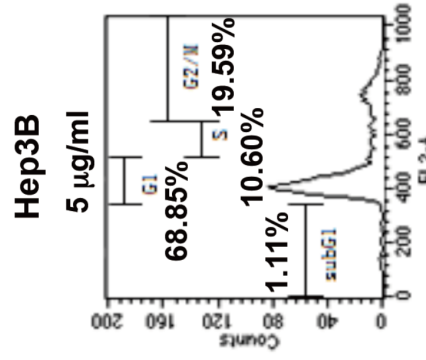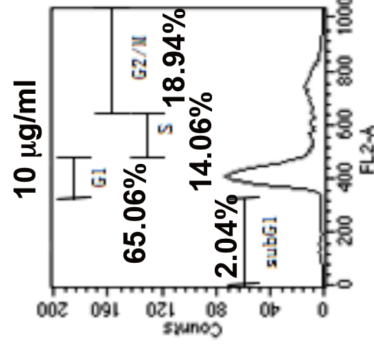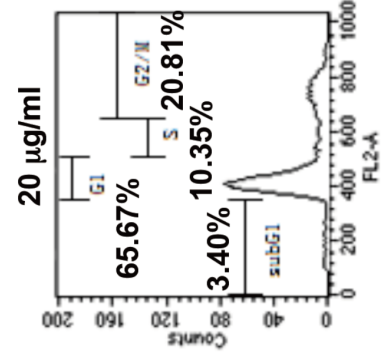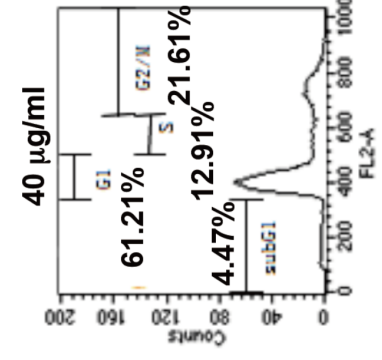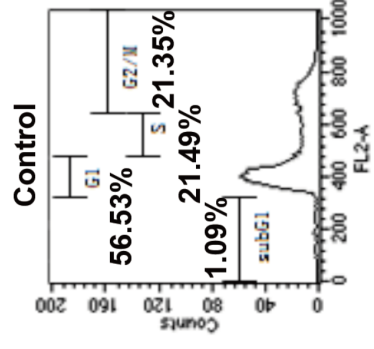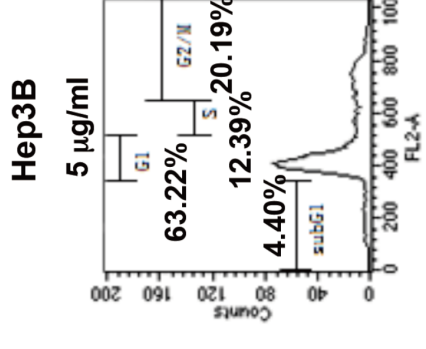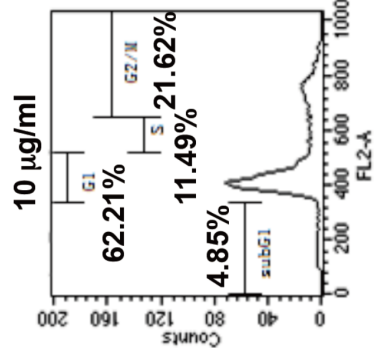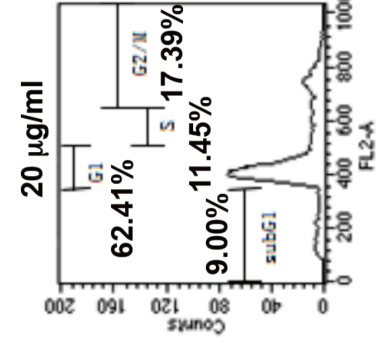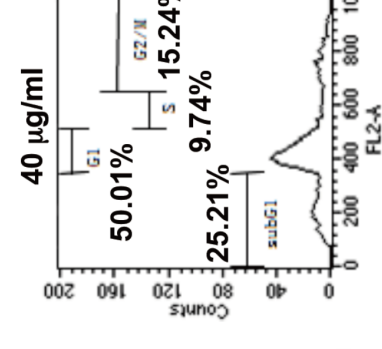

PI Staining (48 h)

PI Staining (72 h)
